# Supplementary material for: Bacterial RecA Protein Promotes Adenoviral Recombination during In Vitro Infection
Source: PubMed Central journal article supplement (PMC6010623; doi:10.1128/msphere.00105-18), 2018-06-20

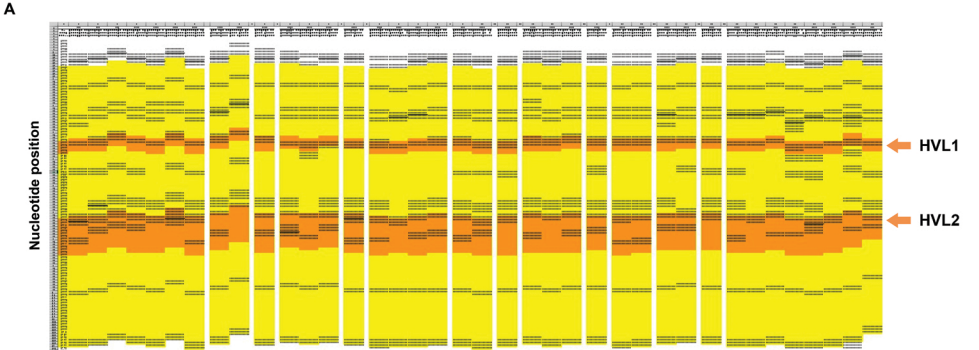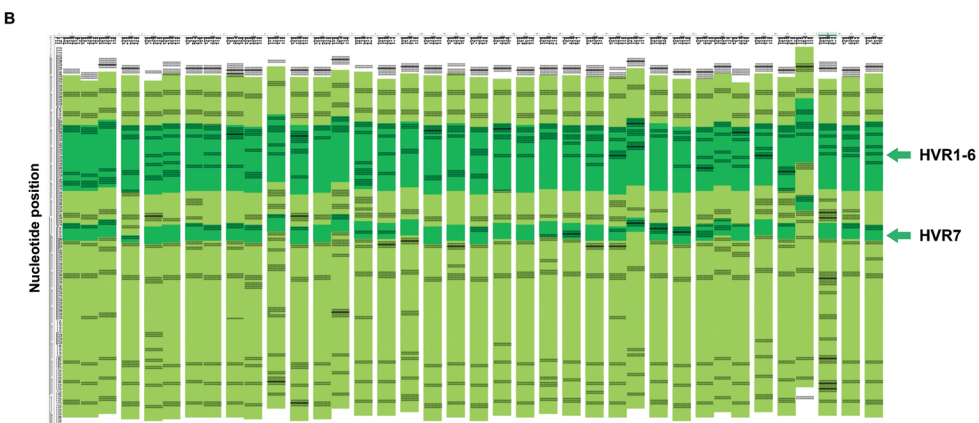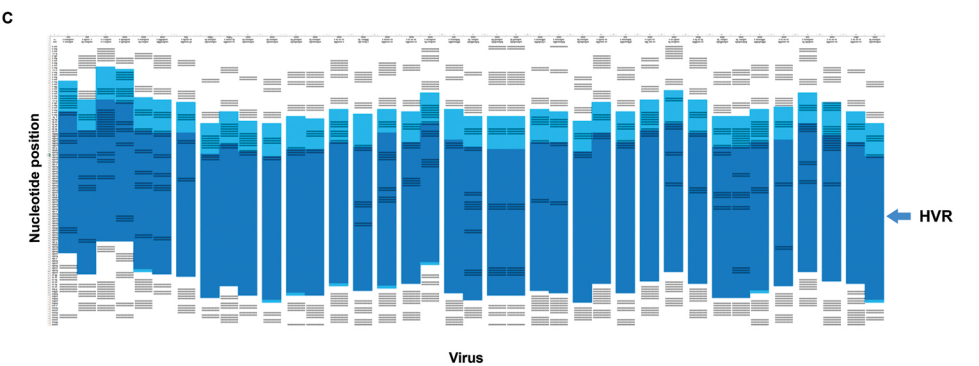

Supplement: sph003182573sf1.pdf [file sph003182573sf1.pdf]
